# Supplementary material for: Understanding electronic and optical properties of anatase TiO2 photocatalysts co-doped with nitrogen and transition metals
Source: Royal Society of Chemistry journal article supplement (doi:10.1039/c3cp51476e), 2013-01-01
Supplement: c3cp51476e.pdf [file c3cp51476e.pdf]

## **Understanding Electronic and Optical Properties of Anatase TiO<sub>2</sub> Photocatalysts co-doped with Nitrogen and Transition Metals**

Qingsen Meng<sup>1</sup>, Tuo Wang<sup>1</sup>, Enzuo Liu<sup>2</sup>, Xinbin Ma<sup>1</sup>, Qingfeng Ge<sup>3</sup>, and Jinlong Gong<sup>1,\*</sup>

<sup>1</sup>*Key Laboratory for Green Chemical Technology of Ministry of Education, School of Chemical Engineering and Technology, Tianjin University, Tianjin, 300072, China*

<sup>2</sup>*School of Materials Science and Engineering, Tianjin University, Tianjin, 300072, China*

<sup>3</sup>*Department of Chemistry and Biochemistry, Southern Illinois University, Carbondale, Illinois 62901, USA*

\*Corresponding author: [jlgong@tju.edu.cn](mailto:jlgong@tju.edu.cn); Fax: 86-022-87401818

Table S1 Determination of Hubbard U parameters\* used in the GGA+U method.

| Metal | Metal oxides                   | Band gap<br>(experimental) | Band gap<br>(calculated) | Hubbard<br><i>U</i> |
|-------|--------------------------------|----------------------------|--------------------------|---------------------|
| Sc    | Sc <sub>2</sub> O <sub>3</sub> | 5.9 eV                     | 5.95                     | 5.0                 |
| Ti    | TiO <sub>2</sub>               | 3.2 eV                     | 3.30                     | 8.2                 |
| V     | V <sub>2</sub> O <sub>5</sub>  | 2.8 eV                     | 2.85                     | 4.5                 |
| Cr    | Cr <sub>2</sub> O <sub>3</sub> | 3.5 eV                     | 3.46                     | 12.0                |
| Mn    | MnO <sub>2</sub>               | 0.25 eV                    | 0.27                     | 9.0                 |
| Fe    | Fe <sub>2</sub> O <sub>3</sub> | 2.2 eV                     | 2.17                     | 6.8                 |
| Co    | CoO                            | 2.6 eV                     | 2.57                     | 10.1                |
| Ni    | NiO                            | 3.5 eV                     | 3.49                     | 10.0                |
| Cu    | CuO                            | 1.7 eV                     | 1.64                     | 6.7                 |
| Zn    | ZnO                            | 3.2 eV                     | 3.22                     | 8.0 <sup>1</sup>    |
| Y     | Y <sub>2</sub> O <sub>3</sub>  | 5.6 eV                     | 5.58                     | 6.7                 |
| Nb    | Nb <sub>2</sub> O <sub>5</sub> | 3.4 eV                     | 3.44                     | 8.0                 |
| Zr    | ZrO <sub>2</sub>               | 5.0 eV                     | 5.00                     | 8.8                 |
| Mo    | MoO <sub>3</sub>               | 3.8 eV                     | 3.77                     | 7.5                 |
| Cd    | CdO                            | 2.2 eV                     | 2.28                     | 2.0 <sup>1</sup>    |

\*The band gap of metal oxides of the corresponding doped transition metals were calculated

by using different U value ranging from 1eV~15 eV.

Table S2 Spin states of doped transition metals in the calculations

| Systems | Spin            |         |         |         |            |         |
|---------|-----------------|---------|---------|---------|------------|---------|
|         | Energy*<br>(eV) | Singlet | Doublet | Triplet | Quadruplet | Quintet |
| Sc, N   | 0.338           |         |         | 0.000   |            |         |
| V, N    | 0.000           |         |         | 0.000   |            |         |
| Cr, N   |                 |         | 0.000   |         | 0.000      |         |
| Mn, N   | 0.000           |         |         | 0.004   |            | 0.001   |
| Fe, N   |                 |         | 0.000   |         | 0.001      |         |
| Co, N   | 0.000           |         |         | 0.358   |            |         |
| Ni, N   |                 |         | 0.000   |         | 0.226      |         |
| Cu, N   | 0.000           |         |         | 0.000   |            |         |
| Zn, N   |                 |         | 0.000   |         | 10.139     |         |
| Y, N    | 0.000           |         |         | 0.030   |            |         |
| Zr, N   |                 |         | 0.000   |         | 0.000      |         |
| Nb, N   | 0.000           |         |         | 0.020   |            |         |
| Mo, N   |                 |         | 0.000   |         | 0.003      |         |
| Cd, N   | 0.338           |         |         | 0.000   |            |         |

\*The lowest energy was set as zero in each co-doped system.

Table S3 Ionic radius (pm) of transition metal considered in this work.<sup>2</sup>

| Sc <sup>3+</sup> | Ti <sup>4+</sup> | V <sup>5+</sup>  | Cr <sup>3+</sup> | Mn <sup>4+</sup>  | Fe <sup>3+</sup>  | Co <sup>2+</sup>  | Ni <sup>4+</sup> | Cu <sup>2+</sup> | Zn <sup>2+</sup> | Zn <sup>2+</sup> |
|------------------|------------------|------------------|------------------|-------------------|-------------------|-------------------|------------------|------------------|------------------|------------------|
| 88.5             | 74.5             | 72               | 75.5             | 67                | 69                | 79                | 62               | 87               | 74*              | 88**             |
| Y <sup>3+</sup>  | Zr <sup>4+</sup> | Nb <sup>5+</sup> | Mo <sup>3+</sup> | #Mn <sup>4+</sup> | #Fe <sup>3+</sup> | #Co <sup>2+</sup> |                  |                  | Cd <sup>2+</sup> | Cd <sup>2+</sup> |
| 104              | 86               | 78               | 83               | 78.5              | 78.5              | 88.5              |                  |                  | 92*              | 109**            |

\*The radius of the 4-coordinated Zn (Cd) atom.

\*\*This radius of the 6-coordinated Zn (Cd) atom.

#Ionic radius (pm) of doped transition metal with high spin state.

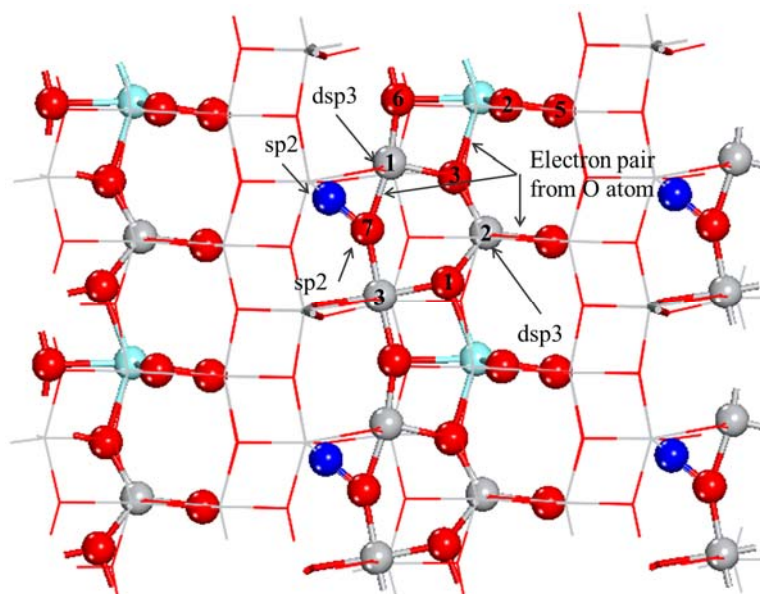

Fig. S1 Local electronic structure of (Y, N) co-doped  $\text{TiO}_2$ , the natter blue ball is Y atom.

Compare with (Sc, N) co-doped system, no IELs were found in the gap region of (Y, N) system. Mulliken population analysis indicates that the population of N-Ti<sub>1</sub> bond that connects the O-Y bond has decreased from 0.27 (in the N-doped system) to 0.02, indicating the cleavage of this N-Ti<sub>1</sub> bond. Different from the (Sc, N) co-doped system; the N atom is in a planar triangle structure with the two N-Ti bonds and one newly formed N-O<sub>7</sub> bond, indicating a  $sp^2$  hybridization. In this N atom, 3 electrons fill in the bonding orbitals and the other 2 electrons fill in the non-bonding  $p_z$  orbitals. The O<sub>7</sub> atom also shows a  $sp^2$  hybridization, two electrons filled in the N-O<sub>7</sub> and O<sub>7</sub>-Ti<sub>3</sub> bonding orbitals, the other 2 electrons filled in the O<sub>7</sub>-Ti<sub>1</sub> bonding orbital. Meanwhile, the Ti<sub>1</sub> atom is five coordinated, indicating a  $dsp^3$  hybridization. As such, four electrons filled in four bonding orbitals with the last bonding orbitals being filled by the lone pair from the O<sub>7</sub> atom. The same situation was also observed in Ti<sub>2</sub> atom, with the electron pair from O<sub>8</sub> filled in the O<sub>8</sub>-Ti<sub>2</sub> bonding orbital. In turn, the bonding orbital of O<sub>3</sub>-Ti<sub>1</sub> and O<sub>3</sub>-Ti<sub>2</sub> are filled by one Ti electron and one O electron, which means the O<sub>3</sub>-Y bonding orbitals are filled by the

electron pair that comes from  $O_3$  atom. Thus, the situation of the six O-Y bonds surrounded the Y atoms is clarified, three of them are formed by electrons come from Y and O (Y-O<sub>2</sub>, Y-O<sub>4</sub>, Y-O<sub>6</sub>; see [Table 3](#)); the other three are formed by electron pairs come from O atoms (Y-O<sub>1</sub>, Y-O<sub>3</sub>, and Y-O<sub>5</sub>).

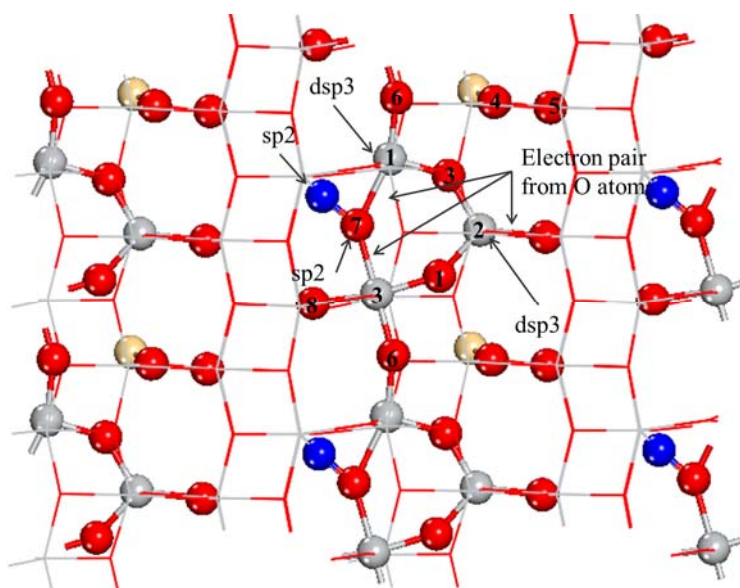

Fig. S2 Local electronic structure of (Cd, N) co-doped  $\text{TiO}_2$ , the gold ball is Cd atom.

For (Cd, N) co-doped  $\text{TiO}_2$ , the Mulliken population analysis indicates that Cd only binds the two O atoms ( $\text{Cd-O}_2$  and  $\text{Cd-O}_4$ , Table 3) through a  $sp$  hybridization. Thus, the  $\text{O}_1$ ,  $\text{O}_3$ ,  $\text{O}_5$  and  $\text{O}_6$  atoms all show  $sp^2$  hybridization, with two electrons filling in two O-Ti bonding orbitals. The other two electron pairs are retained on the atom, which can act as an electron donor.

Similar to the (Y, N) co-doped system, the  $\text{Ti}_1$  atom is five coordinated, showing a  $dsp^3$  hybridization, with 4 electrons filling in four bonding orbitals and the electron pair coming from the  $\text{O}_7$  atom fill in the last bonding orbital. Meanwhile, the  $\text{Ti}_3$  atom is six coordinated, 4 electrons filled in four bonding orbitals, and the last two bonding orbitals are filled by the electron pair that comes from the  $\text{O}_7$  and  $\text{O}_8$  atoms. Thus, the electrons for the N- $\text{O}_7$  bonding orbital are the lone electron pair from N atom. Consequently, we confirmed that the valence electrons of N atom in this structure show  $sp^2$  hybridization, only one electron filled in the  $p_z$  orbital of N. Thus, in the orbital analysis, the IELs located in the gap region of (Cd, N) co-doped system shows N  $p_z$  feature (see Fig. 6).

Large version of the band structure, orbital analysis and DOS results of the co-doped TiO<sub>2</sub>

(Sc, N)



## Reference

- (1) Bai, L. N.; Zheng, B. J.; Lian, J. S.; Jiang, Q. *Solid State Sci.* **2012**, *14*, 698.
- (2) Winter, M. J.; The University of Sheffield and WebElements Ltd, UK: 1993-2012.
